# Supplementary material for: Response of surface shortwave cloud radiative effect to greenhouse gases and aerosols and its impact on summer maximum temperature
Source: Copernicus journal article supplement (doi:10.5194/acp-20-8251-2020), 2020-07-16
Supplement: Supplementary file 1 [file acp-20-8251-2020-supplement.pdf]

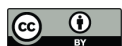

*Supplement of*

**Response of surface shortwave cloud radiative effect to greenhouse gases and aerosols and its impact on summer maximum temperature**

**Tao Tang et al.**

*Correspondence to:* Tao Tang (tao.tang@duke.edu)

The copyright of individual parts of the supplement might differ from the CC BY 4.0 License.

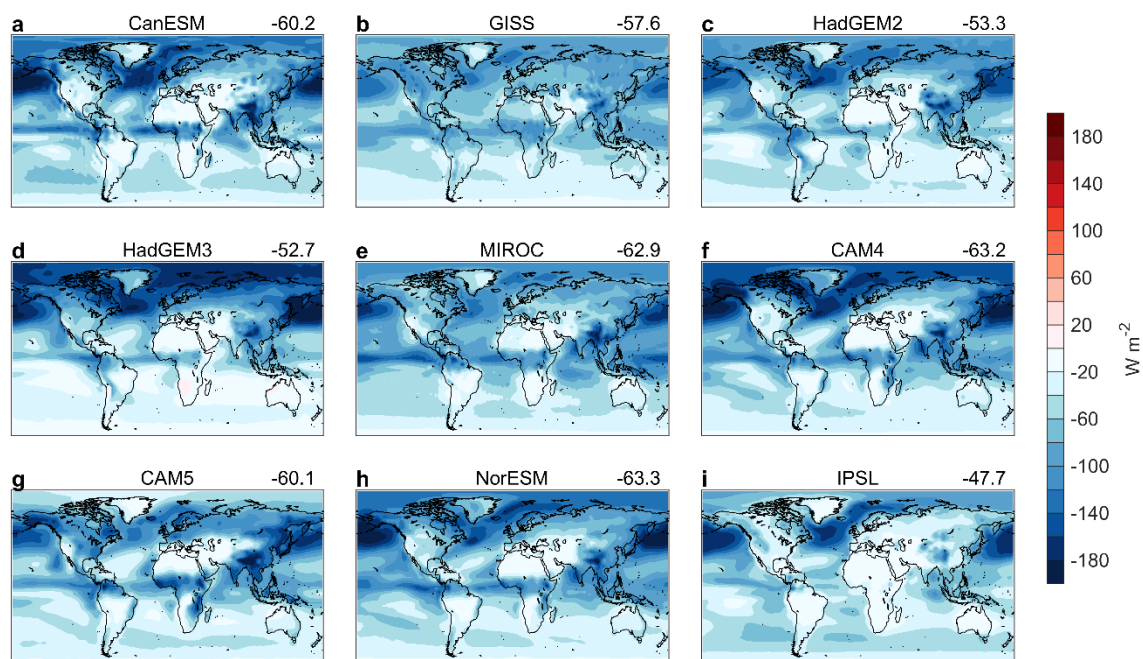

**Figure S1: SWCRE in the base climate for each model. The global mean values are shown in the upper-right corner.**

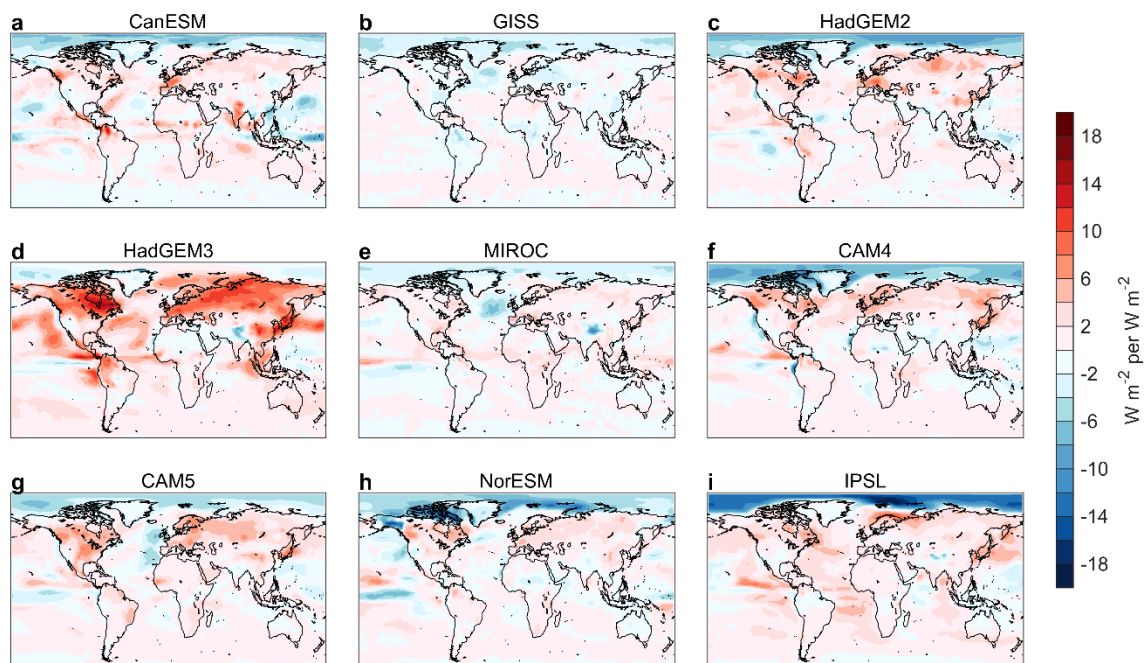

**Figure S2: SWCRE changes per unit forcing by individual models for the CO<sub>2</sub> experiment.**

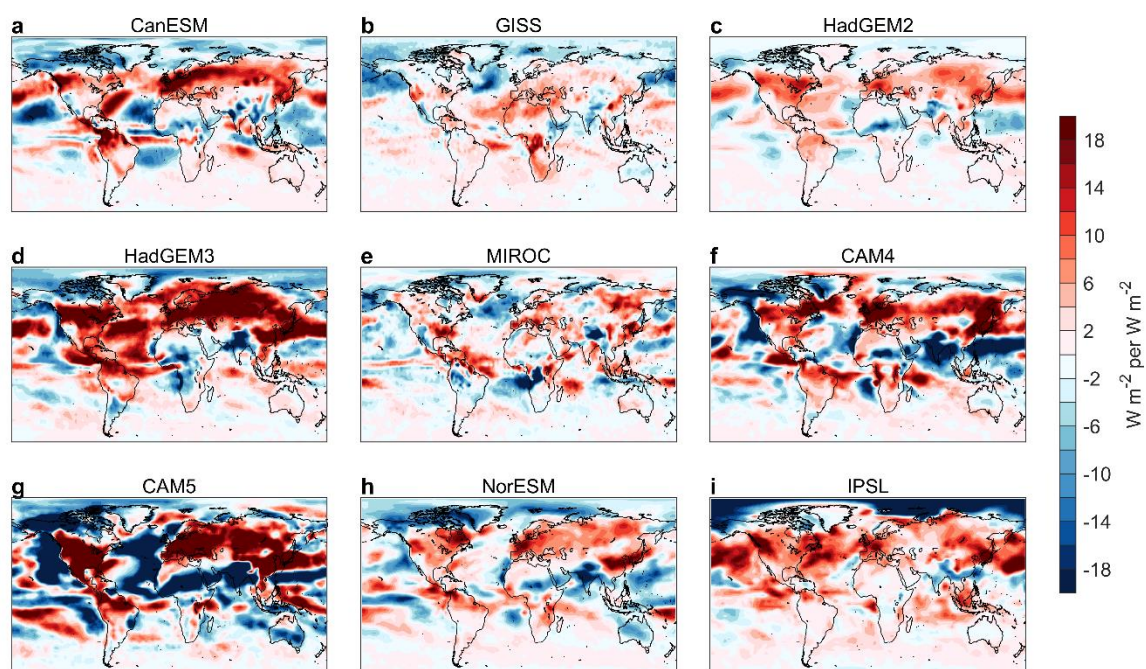

**Figure S3: SWCRE changes per unit forcing by individual models for the BC experiment.**

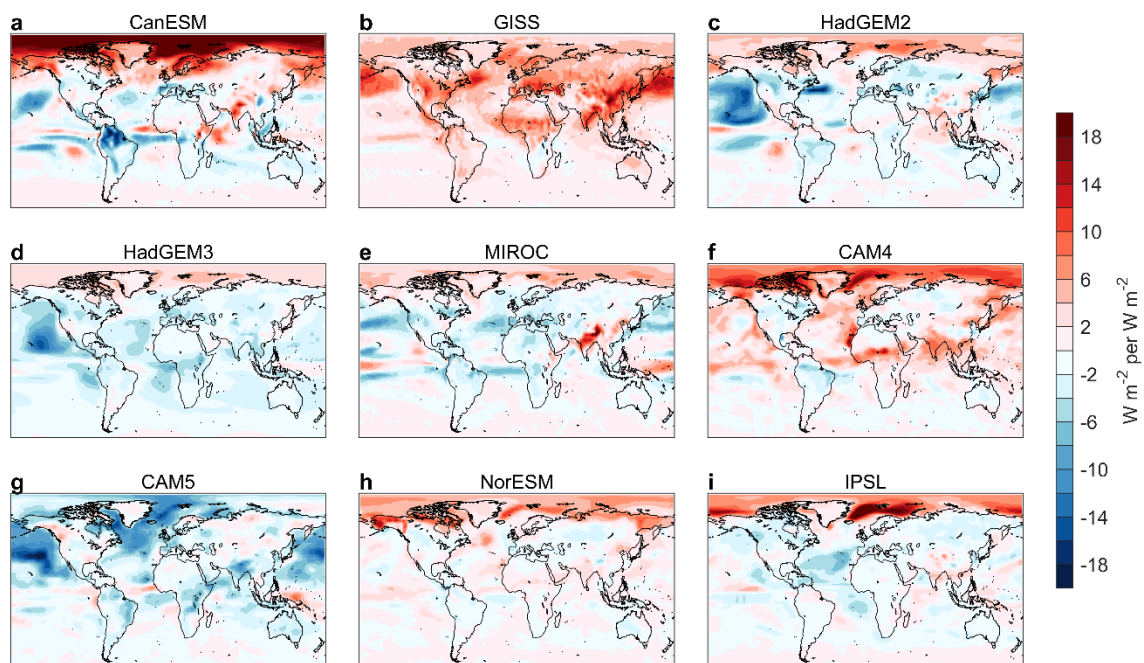

**Figure S4: SWCRE changes per negative forcing for the sulfate aerosol experiment.**

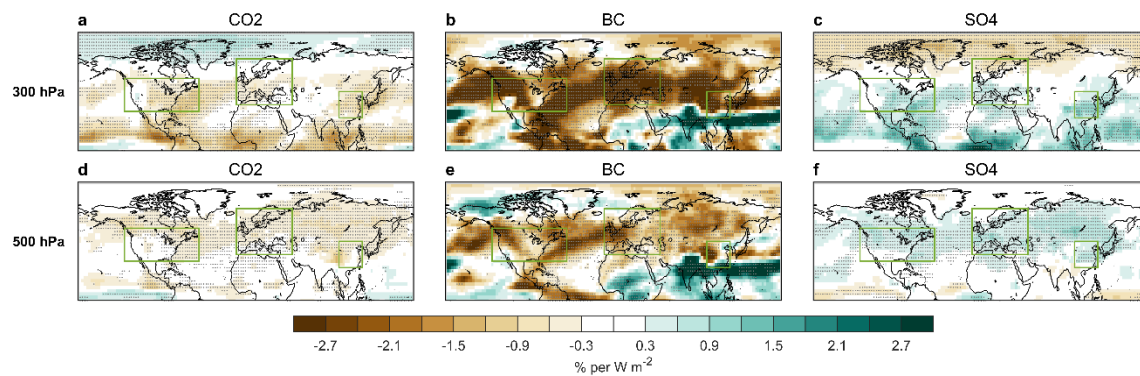

**Figure S5:** same as Fig. 2(d-f) in the main text, but for cloud cover changes at 300 hPa and 500 hPa.

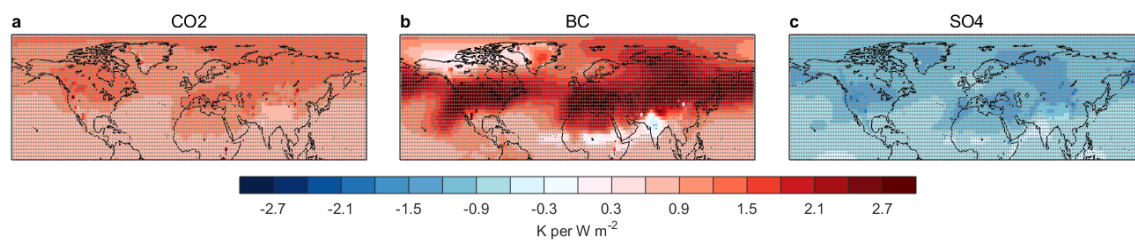

**Figure S6: same as Fig. 2 in the main text, but for temperature at 850 hPa.**



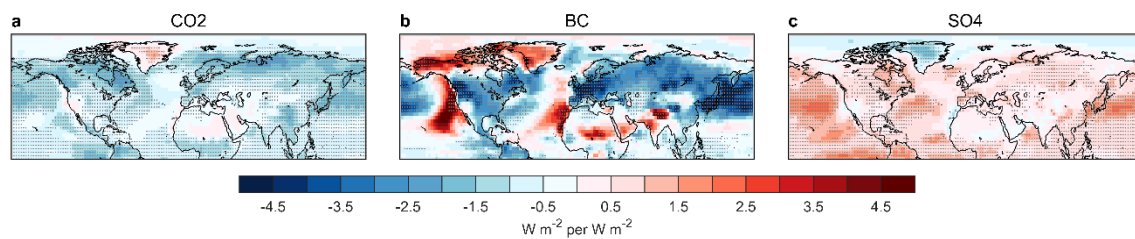

**Figure S7: same as Fig. 2(a-c) in the main text, but for LWCRE.**
